# Supplementary material for: The Molecular Mechanisms of the Relationship between Insulin Resistance and Parkinson’s Disease Pathogenesis
Source: MDPI journal article supplement (doi:10.3390/nu15163585), 2023-08-15
Supplement: s1 [file s1]

**Table S1.** Pathways and the pathological processes involved in insulin resistance and Parkinson`s disease.

| Pathological process           | Dysregulated Pathway                              | IR effects in PD                                                                                                                                                                                                                                                                                                                                                                                         |
|--------------------------------|---------------------------------------------------|----------------------------------------------------------------------------------------------------------------------------------------------------------------------------------------------------------------------------------------------------------------------------------------------------------------------------------------------------------------------------------------------------------|
| $\alpha$ -synuclein aggregates | PI3K/Akt                                          | Insulin signaling disrupted<br>$\alpha$ -synuclein overproduction<br>Abnormal $\alpha$ -synuclein folding<br>Lewy Bodies formation<br>Neurotoxicity                                                                                                                                                                                                                                                      |
| Dopaminergic Neuronal Death    | PI3K/Akt/GSK-3<br><br>Ubiquitin Proteasome System | Ir and IGF-1r Under-phosphorylation<br>IRS-1 and IRS-2 hyperphosphorylation<br>Akt inhibition<br>GSK3 $\beta$ activation<br><br>Insulin receptor and insulin signaling molecules degradation<br>Ubiquitin ligase enzymes (E3) dysfunction <ul style="list-style-type: none"> <li>- Neuronal pro-survival protein proteolysis</li> <li>- Neuronal pro-apoptotic caspase proteolysis inhibition</li> </ul> |
| Neuroinflammation              | NF- $\kappa$ B                                    | PI3K/Akt/GSK3 $\beta$ pathway disruption<br>Overactivated GSK3 $\beta$ <ul style="list-style-type: none"> <li>- High <math>\alpha</math>-synuclein levels</li> <li>- NF-<math>\kappa</math>B pathway upregulation</li> <li>- Proinflammatory cytokines release</li> </ul>                                                                                                                                |
| Mitochondrial dysfunction      | Parkin/PINK1/PGC-1 $\alpha$                       | High $\alpha$ -synuclein levels <ul style="list-style-type: none"> <li>- Mitochondrial membrane depolarization</li> <li>- Mitochondrial fragmentation</li> <li>- Oxidative stress</li> </ul>                                                                                                                                                                                                             |
| Neuronal autophagy             | PI3K/AKT/mTOR<br><br>AMPK/mTOR                    | Decreased IGF-2<br>mTOR inhibition<br>Misfolded proteins accumulation<br><br>Autophagy development<br>Energetic metabolism alteration<br>Synaptic and cognitive impairment                                                                                                                                                                                                                               |
